# Supplementary material
Source: publisher figshare collection journal article supplement (https://asha.figshare.com/ndownloader/files/38928194)
Supplement: Supplementary file 1 [file 38928194]

American English Variety: \_\_\_\_\_

|                            | Phonology | Syntax | Morphology | Semantics | Metalinguistic |
|----------------------------|-----------|--------|------------|-----------|----------------|
| <b>Example Feature</b>     |           |        |            |           |                |
| <b>Feature Description</b> |           |        |            |           |                |

**Completed Example:**

American English Variety: Miami English

|                            | Phonology | Syntax                                 | Morphology                                                                        | Semantics                | Metalinguistic                                                                                                                    |
|----------------------------|-----------|----------------------------------------|-----------------------------------------------------------------------------------|--------------------------|-----------------------------------------------------------------------------------------------------------------------------------|
| <b>Example Feature</b>     | "blue"    | "I don't want nothing from the store." | "Chanks"                                                                          | "Pero like"              | "Friendo huevo" non-linguistic sound/oral gesture                                                                                 |
| <b>Feature Description</b> | Light "l" | Double negative                        | Trans-literation and shortening of "chancletas" (sandals) with plural "-s" in MAE | Codeswitching "but like" | An oral gesture similar to "sucking your teeth," which translate to "frying eggs" – it means you disapprove of what someone said. |
